# Supplementary material for: Scaling laws to predict humidity-induced swelling and stiffness in hydrogels
Source: Royal Society of Chemistry journal article supplement (doi:10.1039/d1sm01186c), 2021-01-01
Supplement: d1sm01186c1.pdf [file d1sm01186c1.pdf]

# Supplementary Information for "Scaling laws to predict humidity-induced swelling and stiffness in hydrogels"

September 20, 2021

## 1 Chemicals

The chemicals used in the preparation of hydrogels are listed below:

Acrylamide (AAm)

N,N' - Methylenebis(acrylamide) (MBA)

Ammonium Persulfate (APS)

N,N,N',N' - tetramethylethane - 1,2 - dimine (TEMED)

N,N - Dimethylacrylamide (DMA)

All chemicals used in this paper are purchased from Sigma-Aldrich Co.

## 2 Figures

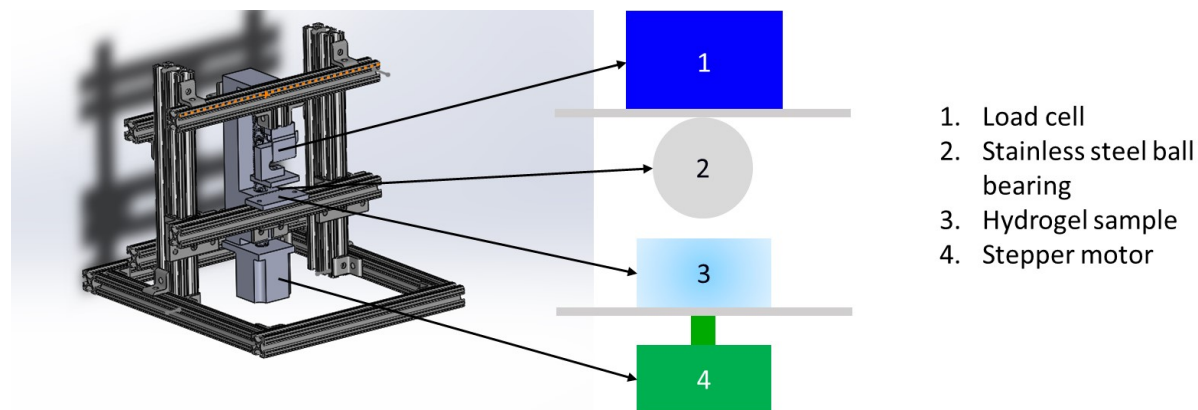

Figure S1: Indentation testing setup

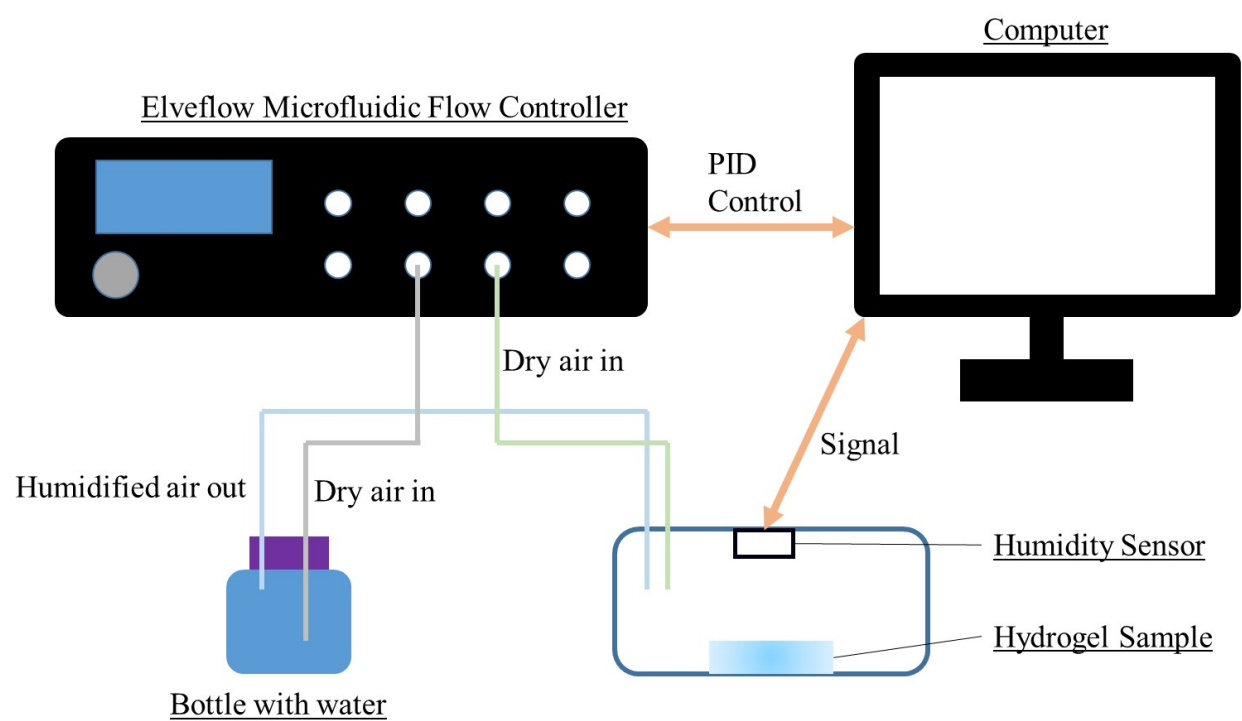

Figure S2: Humidity-controlled chamber setup

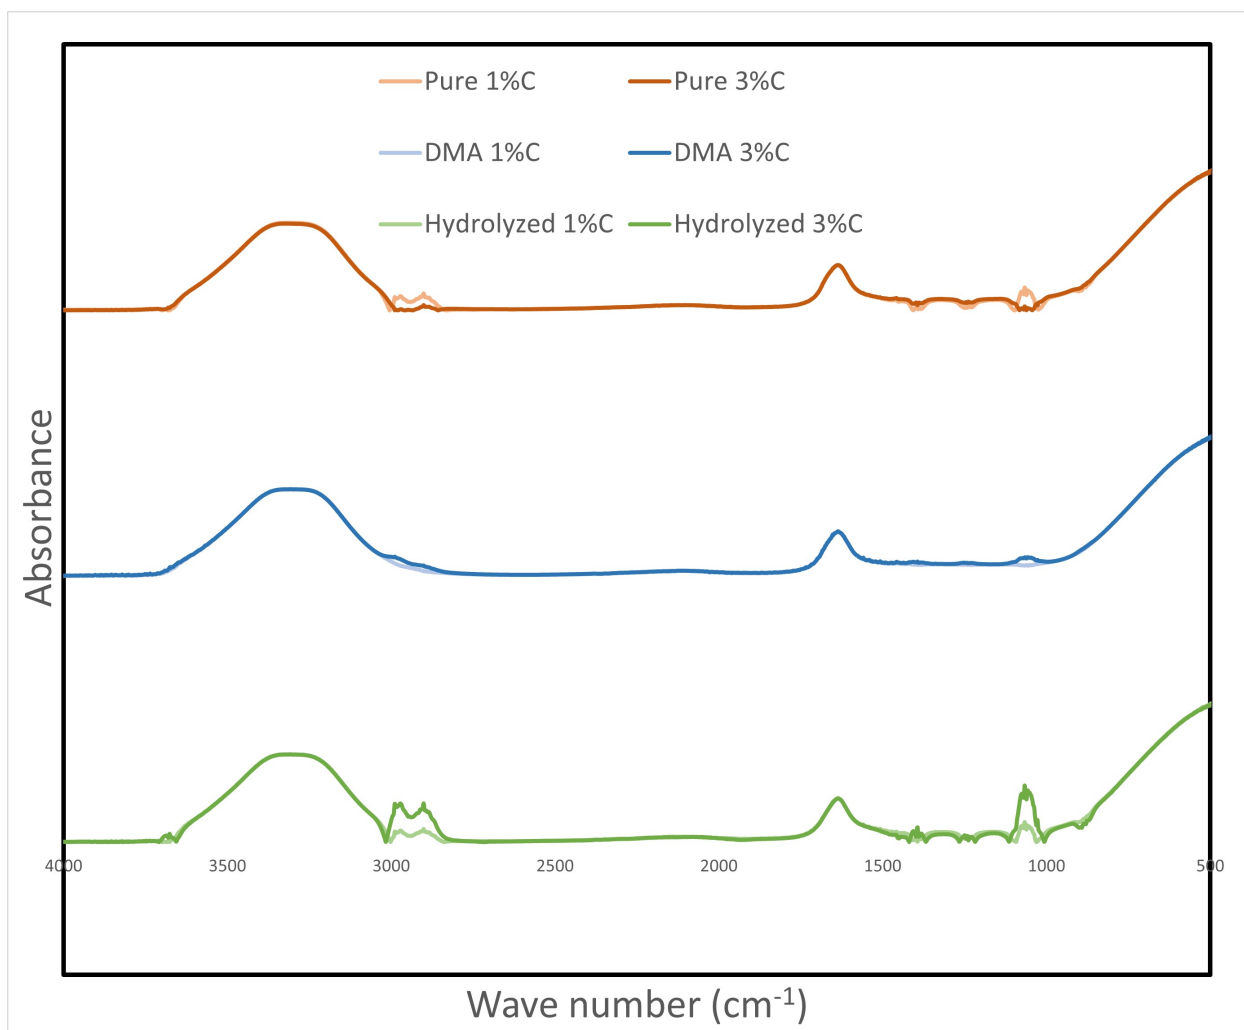

Figure S3: FTIR spectra indicate three different hydrogel polymer mesh families.

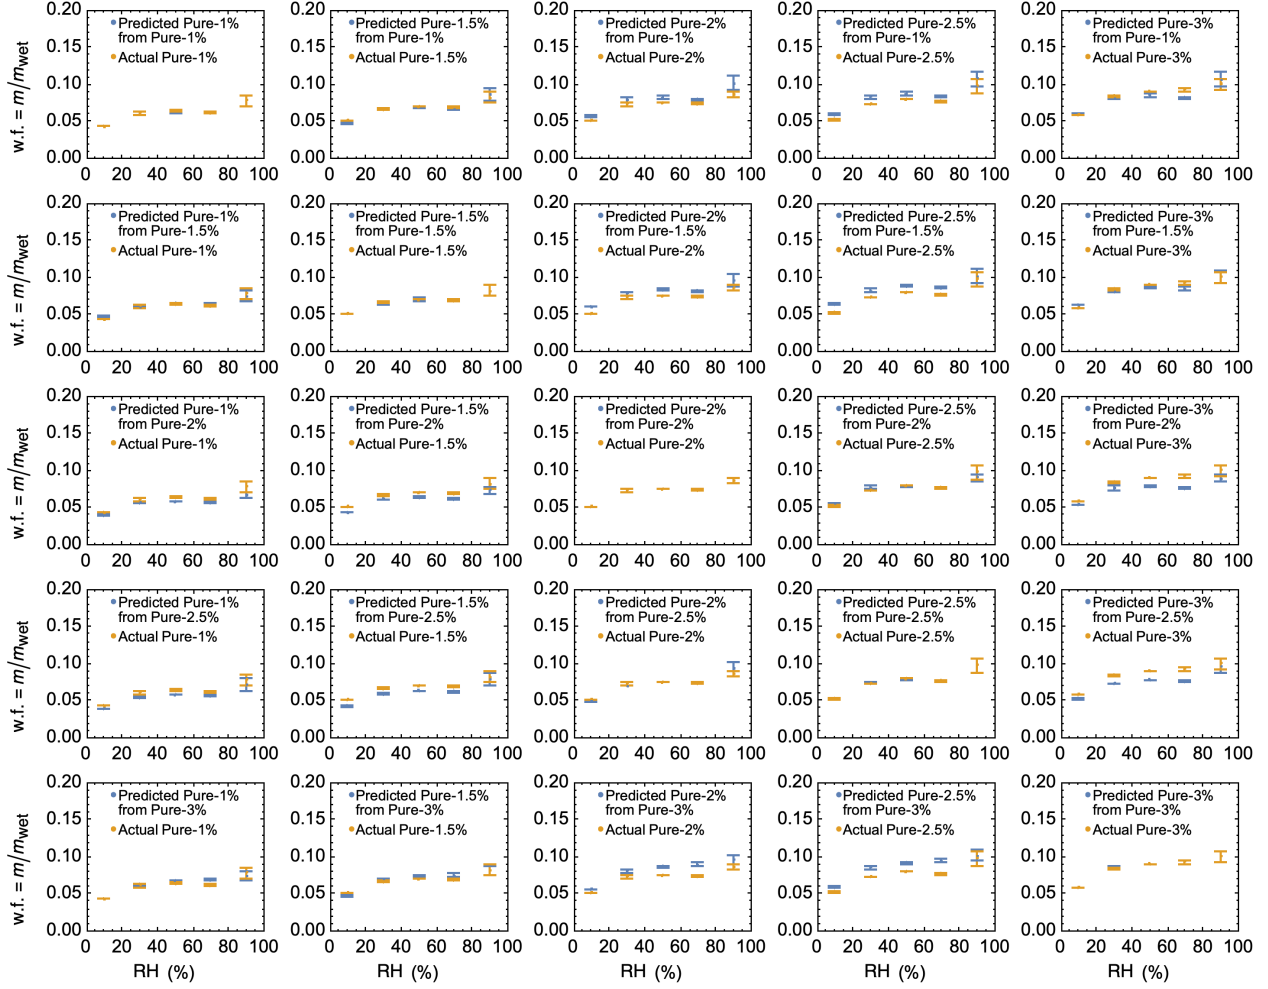

Figure S4: All prediction data (Pure PAAm Hydrogel) compared with actual data shows close agreement.

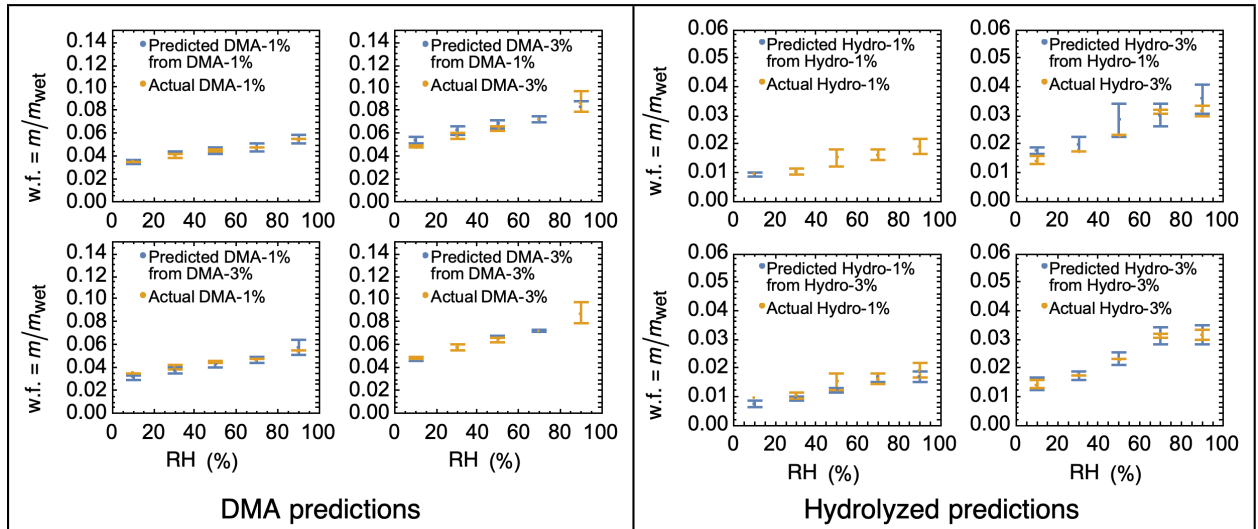

Figure S5: All prediction data (PAAm Hydrogel with DMA (left) or hydrolysis (right)) compared with actual data shows close agreement.
